# Supplementary material
Source: publisher figshare collection journal article supplement (https://gsajournals.figshare.com/ndownloader/files/23204507)
Supplement: Supplementary file 1 [file 23204507]

## Sheet: Feuil1
Table S2. List of the cultivars used in the study and their origin.
Seeds from cultivars were produced for seed trade purposes by plant breeders from three generations of intercross in panmixia from 8 to 30 selected founder genotypes.
Entry number (as used in this study)	Breeder institutes or companies (country)	Cultivar names
575	IBERS (GB)	AberAvon
920	IBERS (GB)	Aberchoice
573	IBERS (GB)	AberDart
925	IBERS (GB)	Abermagic
921	IBERS (GB)	Aberstar
928	Agroscope (CH)	Arvicola
572	IBERS (GB)	Aurora
927	DLF (DK)	Bahima1
926	Barenbrug (NL)	Barata
564	NZ Agriseeds (NZ)	Bartango
563	Barenbrug (RO)	Barutti
929	DLF (DK)	Boyne
940	NZ Agriseeds (NZ)	Bronsyn
930	Semences de France (FR)	Cangou
568	INRA (FR)	Clerpin
565	PGG Wrightson (NZ)	Expo
571	NPZ (DE)	Fennema
931	DLF (DK)	Foundation
932	DLF (DK)	Glenvale
941	AgResearch (NZ)	Hillary
922	DLF (DK)	Humbi
923	Innoseeds (NL)	Jalinas
569	DSV (DE)	Lipresso
566	Barenbrug (RO)	Mara
942	Dep. Agr. South Australia (AU)	Medea
924	ILVO (BE)	Melluck
577	ILVO (BE)	Meloni
576	ILVO (BE)	Merks
574	DLF (DK)	Premium
933	DSV (DE)	Rodrigo
943	NZ Agriseeds (NZ)	Trojan
570	ILVO (BE)	Vigor
